# Supplementary material
Source: publisher figshare collection journal article supplement (https://aacr.figshare.com/articles/dataset/_/22539742)
Supplement: Supplementary file 1 [file 40003069]

**Resolving the spatial and cellular architecture of lung adenocarcinoma by multi-region single-cell sequencing**

**SUPPLEMENTARY DATA FILE 4**

**Supplementary Figure S9**

# Supplementary Fig. S9

## A

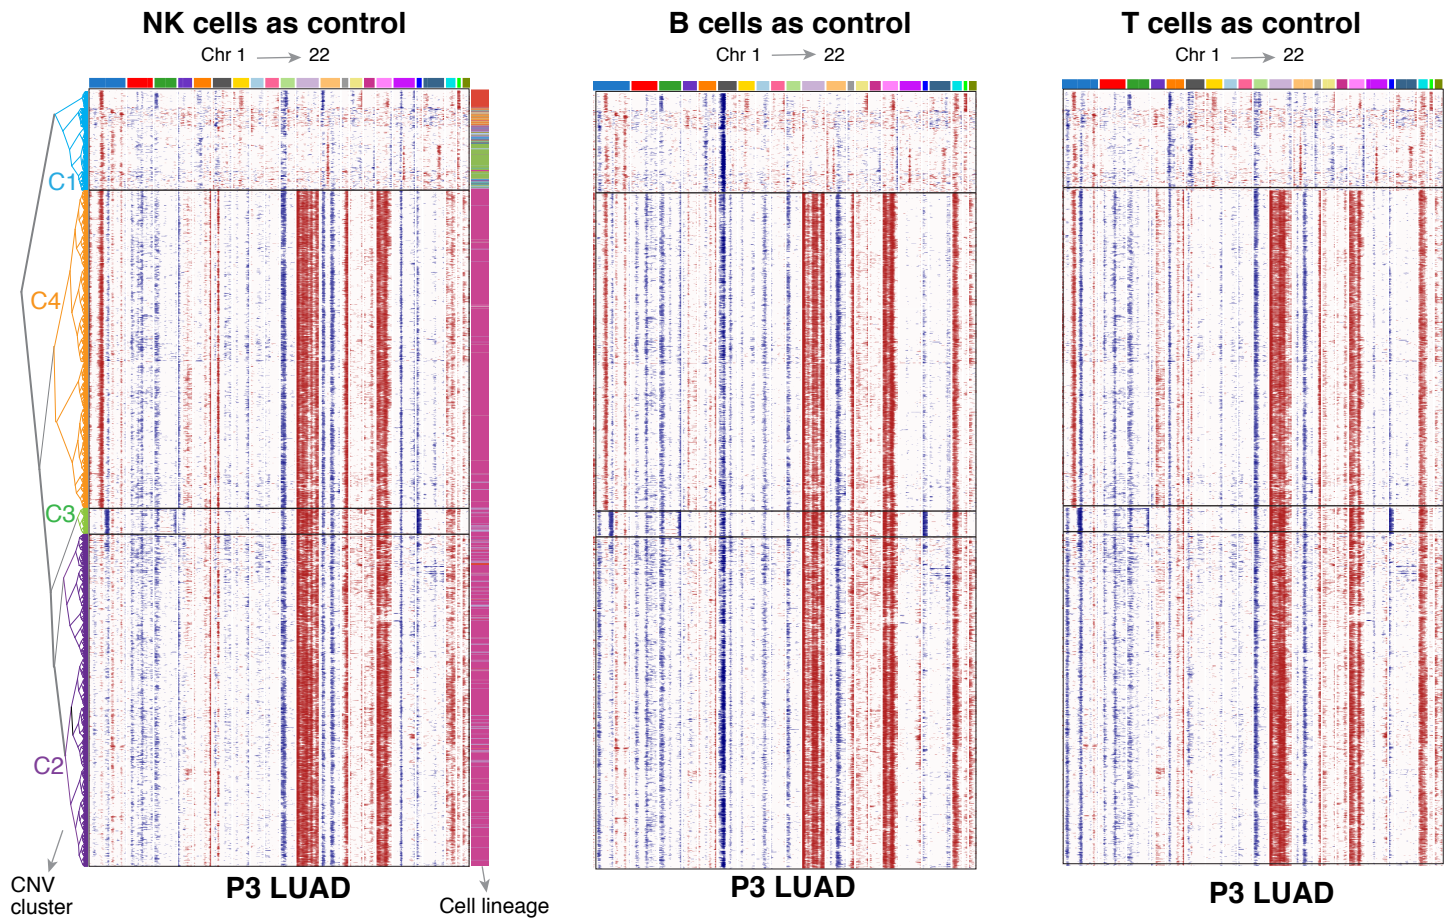

## B

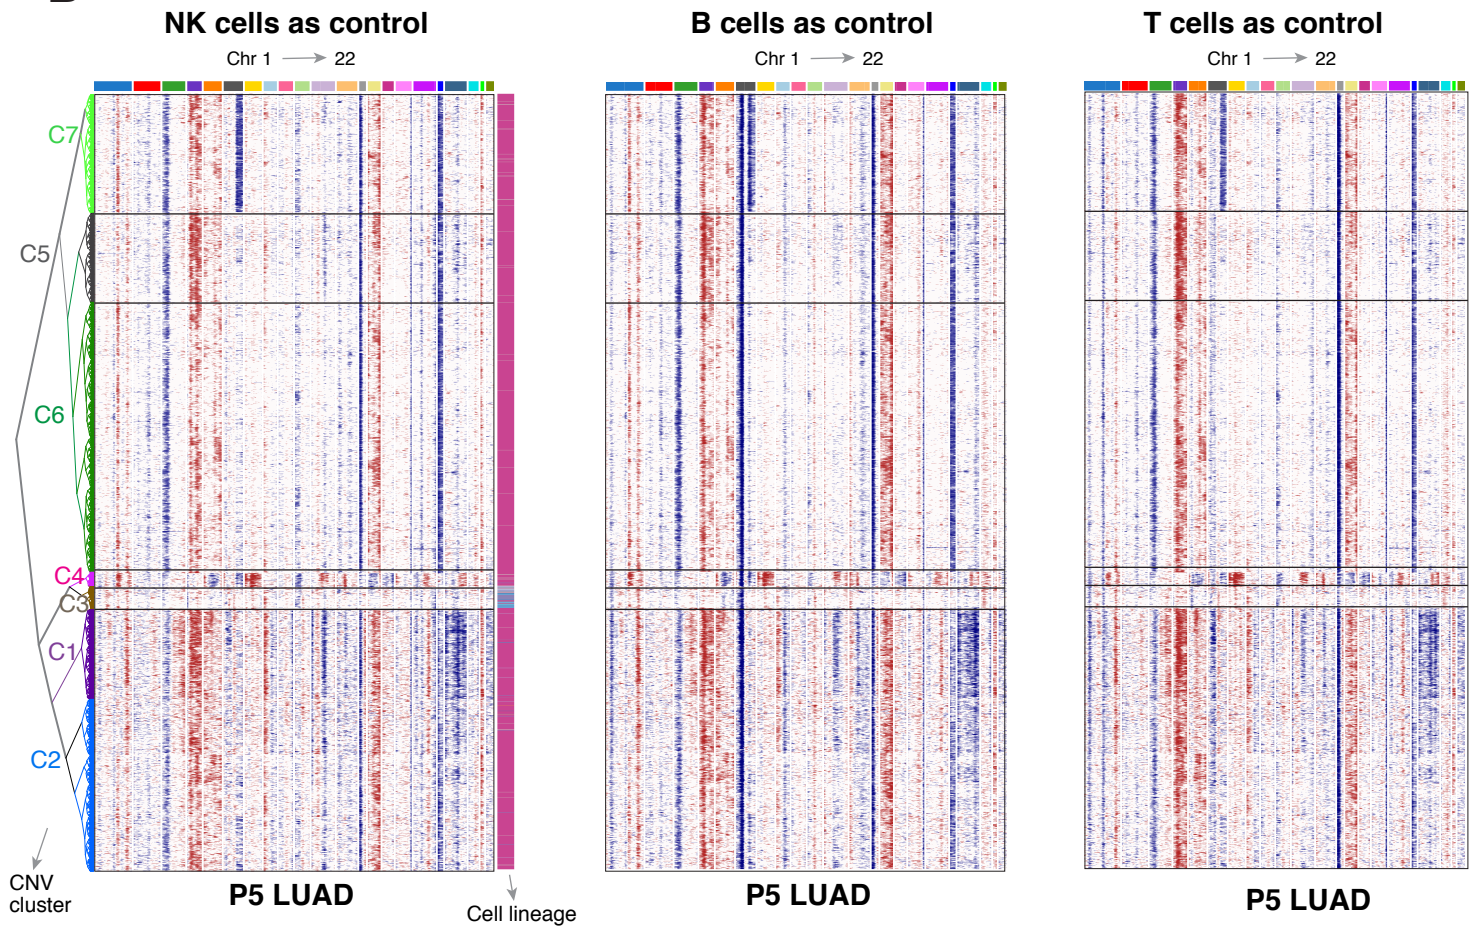

**Supplementary Fig. S9. Robustness of CNV inference in C9 cells from P3 and P5.**

**A**, Heatmaps showing CNV scores of cells in the malignant-enriched cluster of P3 using NK cells (left), B cells (middle), T cells (right) as background references. **B**, Heatmaps showing CNV scores of cells in the malignant-enriched cluster of P5 using NK cells (left), B cells (middle), T cells (right) as background references.
